# Supplementary material
Source: HighWire-hosted journal article supplement (https://bmjopen.bmj.com/content/15/3/e088716)
Supplement: inline-supplementary-material-1 [file inline-supplementary-material-1.pdf]

Appendix 1. Detailed overview of the search strategy for PubMed and Scopus

|                                                               | PubMed                                                                                                                                                                                                                                                                                                                                                                                                                                                                                                                                                                                                                                                                                                                                                                                                                                                                                                                                                                                                                                                                                                                                   | Scopus                                                                                                                                                                                                                                                                                                                                                                                                                                                                                                                                                                                                                                                                                                                                                                                                                                                                                                                                                                                                                                                                                                                                                                                                                                                                                                                                                                                                                                                                                                                                                                                                                                                                                                                                                                                                             |
|---------------------------------------------------------------|------------------------------------------------------------------------------------------------------------------------------------------------------------------------------------------------------------------------------------------------------------------------------------------------------------------------------------------------------------------------------------------------------------------------------------------------------------------------------------------------------------------------------------------------------------------------------------------------------------------------------------------------------------------------------------------------------------------------------------------------------------------------------------------------------------------------------------------------------------------------------------------------------------------------------------------------------------------------------------------------------------------------------------------------------------------------------------------------------------------------------------------|--------------------------------------------------------------------------------------------------------------------------------------------------------------------------------------------------------------------------------------------------------------------------------------------------------------------------------------------------------------------------------------------------------------------------------------------------------------------------------------------------------------------------------------------------------------------------------------------------------------------------------------------------------------------------------------------------------------------------------------------------------------------------------------------------------------------------------------------------------------------------------------------------------------------------------------------------------------------------------------------------------------------------------------------------------------------------------------------------------------------------------------------------------------------------------------------------------------------------------------------------------------------------------------------------------------------------------------------------------------------------------------------------------------------------------------------------------------------------------------------------------------------------------------------------------------------------------------------------------------------------------------------------------------------------------------------------------------------------------------------------------------------------------------------------------------------|
| Population:<br>cancer<br>patients &<br>survivors              | ("patient"[MeSH Terms] OR "Survivors"[MeSH Terms] OR "Palliative Care"[MeSH Terms]) AND ("Neoplasms"[MeSH Terms] OR "Carcinoma"[MeSH Terms] OR "post-cancer"[Title/Abstract] OR "postcancer"[Title/Abstract])                                                                                                                                                                                                                                                                                                                                                                                                                                                                                                                                                                                                                                                                                                                                                                                                                                                                                                                            | (( TITLE-ABS-KEY ( "tumor" ) ) OR ( TITLE-ABS-KEY ( "neoplasm" ) ) OR ( TITLE-ABS-KEY ( "neoplasia" ) ) OR ( TITLE-ABS-KEY ( "cancer" ) ) OR ( TITLE-ABS-KEY ( "malignanc" ) ) OR ( TITLE-ABS-KEY ( "carcinoma" ) ) OR ( TITLE-ABS-KEY ( "postcancer" ) ) OR ( TITLE-ABS-KEY ( "post-cancer" ) ) ) AND (( TITLE-ABS-KEY ( "palliative care" ) ) OR ( TITLE-ABS-KEY ( "palliative treatment" ) ) OR ( TITLE-ABS-KEY ( "palliative therap" ) ) OR ( TITLE-ABS-KEY ( "palliative surger" ) ) OR ( TITLE-ABS-KEY ( "palliative supportive care" ) ) OR ( TITLE-ABS-KEY ( "survivor" ) ) OR ( TITLE-ABS-KEY ( "patient" ) ) ) )                                                                                                                                                                                                                                                                                                                                                                                                                                                                                                                                                                                                                                                                                                                                                                                                                                                                                                                                                                                                                                                                                                                                                                                         |
| Exposure:<br>psychometric<br>properties                       | AND ("instrument"[Title/Abstract] OR "questionnaire"[Title/Abstract] OR "measur"[Title/Abstract] OR "rating"[Title/Abstract] OR "computer"[Title/Abstract] OR "digital"[Title/Abstract] OR "computer-adaptive test"[Title/Abstract] OR "computer adaptive test"[Title/Abstract] OR "computer adaptive"[Title/Abstract] OR "computer-adaptive"[Title/Abstract] OR "computerized adaptive test"[Title/Abstract] OR "computerised adaptive test"[Title/Abstract] OR "CAT"[Title/Abstract]) AND ("chronbach"[Title/Abstract] OR "cronbach"[Title/Abstract] OR "psychometric properties"[Title/Abstract] OR "psychometr"[Title/Abstract] OR "factor analysis"[Title/Abstract] OR "develop"[Title/Abstract] OR "reliab"[Title/Abstract] OR "valid"[Title/Abstract] OR "translat"[Title/Abstract] OR "cross-cultural"[Title/Abstract] OR "minimal clinically important difference"[Title/Abstract] OR "minimal important change"[Title/Abstract] OR "minimal important difference"[Title/Abstract] OR "clinically meaningful change"[Title/Abstract] OR "clinically meaningful difference"[Title/Abstract] OR "responsiveness"[Title/Abstract]) | AND (( TITLE-ABS-KEY ( "questionnaire" ) ) OR ( TITLE-ABS-KEY ( "questionnaires" ) ) OR ( TITLE-ABS-KEY ( "instrument" ) ) OR ( TITLE-ABS-KEY ( "instruments" ) ) OR ( TITLE-ABS-KEY ( "rating" ) ) OR ( TITLE-ABS-KEY ( "outcome measure" ) ) OR ( TITLE-ABS-KEY ( "outcome measures" ) ) OR ( TITLE-ABS-KEY ( "measurement tool" ) ) OR ( TITLE-ABS-KEY ( "measurement tools" ) ) OR ( TITLE-ABS-KEY ( "computer-based" ) ) OR ( TITLE-ABS-KEY ( "digital" ) ) OR ( TITLE-ABS-KEY ( "computer adaptive test" ) ) OR ( TITLE-ABS-KEY ( "computer-adaptive test" ) ) OR ( TITLE-ABS-KEY ( "computer-adaptive" ) ) OR ( TITLE-ABS-KEY ( "computer adaptive" ) ) OR ( TITLE-ABS-KEY ( "computerized adaptive test" ) ) OR ( TITLE-ABS-KEY ( "computerised adaptive test" ) ) OR ( TITLE-ABS-KEY ( "chronbach" ) ) OR ( TITLE-ABS-KEY ( "cronbach" ) ) OR ( TITLE-ABS-KEY ( "psychometric properties" ) ) OR ( TITLE-ABS-KEY ( "psychometric analysis" ) ) OR ( TITLE-ABS-KEY ( "psychometric evaluation" ) ) OR ( TITLE-ABS-KEY ( "psychometric characteristics" ) ) OR ( TITLE-ABS-KEY ( "factor analysis" ) ) OR ( TITLE-ABS-KEY ( "reliability" ) ) OR ( TITLE-ABS-KEY ( "reliable" ) ) OR ( TITLE-ABS-KEY ( "validity" ) ) OR ( TITLE-ABS-KEY ( "valid" ) ) OR ( TITLE-ABS-KEY ( "validation" ) ) OR ( TITLE-ABS-KEY ( "minimal clinically important difference" ) ) OR ( TITLE-ABS-KEY ( "clinically meaningful change" ) ) OR ( TITLE-ABS-KEY ( "clinically meaningful difference" ) ) OR ( TITLE-ABS-KEY ( "responsiveness" ) ) OR ( TITLE-ABS-KEY ( "minimal important change" ) ) OR ( TITLE-ABS-KEY ( "minimal important difference" ) ) OR ( TITLE-ABS-KEY ( "translation" ) ) OR ( TITLE-ABS-KEY ( "translated" ) ) OR ( TITLE-ABS-KEY ( "cross-cultural" ) ) OR ( TITLE-ABS-KEY ( "development" ) ) ) ) |
| Outcome:<br>Health-related<br>Quality of Life                 | AND ("quality of life"[MeSH Terms] OR "perceived health"[Text Word] OR "health status"[Text Word] OR "life satisfaction"[Text Word] OR "well-being"[Text Word] OR "wellbeing"[Text Word] OR "patient reported outcome measures"[MeSH Terms])                                                                                                                                                                                                                                                                                                                                                                                                                                                                                                                                                                                                                                                                                                                                                                                                                                                                                             | AND ( TITLE-ABS-KEY ( "quality of life" ) ) OR ( TITLE-ABS-KEY ( "life quality" ) ) OR ( TITLE-ABS-KEY ( "patient-reported outcome" ) ) OR ( TITLE-ABS-KEY ( "hrqol" ) ) OR ( TITLE-ABS-KEY ( "patient reported outcome" ) ) OR ( TITLE-ABS-KEY ( "perceived health" ) ) OR ( TITLE-ABS-KEY ( "health status" ) ) OR ( TITLE-ABS-KEY ( "well-being" ) ) OR ( TITLE-ABS-KEY ( "wellbeing" ) ) )                                                                                                                                                                                                                                                                                                                                                                                                                                                                                                                                                                                                                                                                                                                                                                                                                                                                                                                                                                                                                                                                                                                                                                                                                                                                                                                                                                                                                     |
| Exclusion<br>string Terwee<br>et al. 2009 +<br>English filter | AND (english[Filter]) NOT ("addresses"[Publication Type] OR "biography"[Publication Type] OR "case reports"[Publication Type] OR "comment"[Publication Type] OR "directory"[Publication Type] OR "editorial"[Publication Type] OR "festschrift"[Publication Type] OR "interview"[Publication Type] OR "lectures"[Publication Type] OR "legal cases"[Publication Type] OR "legislation"[Publication Type] OR "letter"[Publication Type] OR "news"[Publication Type] OR "newspaper article"[Publication Type] OR "patient education handout"[Publication Type] OR "popular works"[Publication Type] OR "congresses"[Publication Type] OR "consensus development conference"[Publication Type] OR "consensus development conference, nih"[Publication Type] OR "practice guideline"[Publication Type]) NOT ("animals"[MeSH Terms] NOT "humans"[MeSH                                                                                                                                                                                                                                                                                         | AND ( LIMIT TO ( LANGUAGE , "english" ) ) AND ( EXCLUDE ( DOCTYPE , "le" ) OR EXCLUDE ( DOCTYPE , "ed" ) ) AND ( EXCLUDE ( DOCTYPE , "cp" ) )                                                                                                                                                                                                                                                                                                                                                                                                                                                                                                                                                                                                                                                                                                                                                                                                                                                                                                                                                                                                                                                                                                                                                                                                                                                                                                                                                                                                                                                                                                                                                                                                                                                                      |

|  |        |  |
|--|--------|--|
|  | Terms) |  |
|--|--------|--|

## Appendix 2. List of European and associated countries

| European and associated countries |               |                 |  |
|-----------------------------------|---------------|-----------------|-------------------------------------------------------------------------------------|
| Albania                           | Germany       | North-Macedonia |                                                                                     |
| Andorra                           | Greece        | Norway          |                                                                                     |
| Armenia                           | Hungary       | Portugal        |                                                                                     |
| Austria                           | Iceland       | Romania         |                                                                                     |
| Azerbaijan                        | Ireland       | Russia          |                                                                                     |
| Belarus                           | Italy         | San Marino      |                                                                                     |
| Belgium                           | Kazakhstan    | Serbia          |                                                                                     |
| Bulgaria                          | Latvia        | Slovenia        |                                                                                     |
| Croatia                           | Liechtenstein | Slovakia        |                                                                                     |
| Cyprus                            | Lithuania     | Spain           |                                                                                     |
| Czechia                           | Luxembourg    | Sweden          |                                                                                     |
| Denmark                           | Malta         | Switzerland     |                                                                                     |
| Estonia                           | Moldavia      | Turkey          |                                                                                     |
| Finland                           | Monaco        | Ukraine         |                                                                                     |
| France                            | Montenegro    | United Kingdom  |                                                                                     |
| Georgia                           | Netherlands   | Vatican City    |                                                                                     |

Appendix 3. Additional search strategy for European validation papers

1. STEP 1:

- Define entry terms for the SPECIFIC QUESTIONNAIRE:
  - Full name (make sure to enter all the different spelling options)
  - Acronym (make sure to enter all the different spelling options)

Example:

|               |                                                                                                    |
|---------------|----------------------------------------------------------------------------------------------------|
| EORTC-QLQ-C30 | “European Organization for Research and Treatment of Cancer Quality of Life Questionnaire Core 30” |
|               | EORTC-QLQ-C30                                                                                      |
|               | EORTC QLQ-C30                                                                                      |
|               | EORTC QLQ C30                                                                                      |
|               | QLQ C30                                                                                            |

- Combine all the entry terms with OR-function:
  - (“European Organization for Research and Treatment of Cancer Quality of Life Questionnaire Core 30”) OR (eortc-qlq-c30)) OR (eortc qlq-c30)) OR (eortc qlq c30)) OR (qlq c30)

2. STEP 2:

- Enter search string for POPULATION:
  - ("patient"[MeSH Terms] OR "Survivors"[MeSH Terms] OR "Palliative Care"[MeSH Terms]) AND ("Neoplasms"[MeSH Terms] OR "Carcinoma"[MeSH Terms] OR "post-cancer"[Title/Abstract] OR "postcancer"[Title/Abstract])
- Enter search string for PSYCHOMETRIC PROPERTIES:
  - ("instrument"[Title/Abstract] OR "questionnaire"[Title/Abstract] OR "measur"[Title/Abstract] OR "rating"[Title/Abstract] OR "computer"[Title/Abstract] OR "digital"[Title/Abstract] OR "computer-adaptive test"[Title/Abstract] OR "computer adaptive test"[Title/Abstract] OR "computer adaptive"[Title/Abstract] OR "computer-adaptive"[Title/Abstract] OR "computerized adaptive test"[Title/Abstract] OR "computerised adaptive test"[Title/Abstract] OR "CAT"[Title/Abstract]) AND ("chronbach"[Title/Abstract] OR "cronbach"[Title/Abstract] OR "psychometric properties"[Title/Abstract] OR "psychometr"[Title/Abstract] OR "factor analysis"[Title/Abstract] OR "develop"[Title/Abstract] OR "reliab"[Title/Abstract] OR "valid"[Title/Abstract] OR "translat"[Title/Abstract] OR "cross-cultural"[Title/Abstract] OR "minimal clinically important difference"[Title/Abstract] OR "minimal important change"[Title/Abstract] OR "minimal important difference"[Title/Abstract] OR "clinically meaningful change"[Title/Abstract] OR "clinically meaningful difference"[Title/Abstract] OR "responsiveness"[Title/Abstract])

3. STEP 3:

- Combine search strings of POPULATION, PSYCHOMETRIC PROPERTIES and SPECIFIC QUESTIONNAIRE with the AND-function:
  - (((((("European Organization for Research and Treatment of Cancer Quality of Life Questionnaire Core 30") OR (eortc-qlq-c30)) OR (eortc qlq-c30)) OR (eortc qlq c30)) OR (qlq c30)) AND ((("instrument"[Title/Abstract] OR "questionnaire"[Title/Abstract] OR "measur"[Title/Abstract] OR "rating"[Title/Abstract] OR "computer"[Title/Abstract] OR "digital"[Title/Abstract] OR "computer-adaptive test"[Title/Abstract] OR "computer adaptive test"[Title/Abstract] OR "computer adaptive"[Title/Abstract] OR "computer-adaptive"[Title/Abstract] OR "computerized adaptive test"[Title/Abstract] OR "computerised adaptive test"[Title/Abstract] OR "CAT"[Title/Abstract]) AND ("chronbach"[Title/Abstract] OR "cronbach"[Title/Abstract] OR "psychometric properties"[Title/Abstract] OR "psychometr"[Title/Abstract] OR "factor analysis"[Title/Abstract] OR "develop"[Title/Abstract] OR "reliab"[Title/Abstract] OR "valid"[Title/Abstract] OR "translat"[Title/Abstract] OR "cross-cultural"[Title/Abstract] OR "minimal clinically important difference"[Title/Abstract] OR "minimal important change"[Title/Abstract] OR "minimal important difference"[Title/Abstract] OR "clinically meaningful change"[Title/Abstract] OR "clinically meaningful difference"[Title/Abstract] OR "responsiveness"[Title/Abstract])

adaptive"[Title/Abstract] OR "computerized adaptive test"[Title/Abstract] OR "computerised adaptive test"[Title/Abstract] OR "CAT"[Title/Abstract]) AND ("chronbach"[Title/Abstract] OR "cronbach"[Title/Abstract] OR "psychometric properties"[Title/Abstract] OR "psychometr"[Title/Abstract] OR "factor analysis"[Title/Abstract] OR "develop"[Title/Abstract] OR "reliab"[Title/Abstract] OR "valid"[Title/Abstract] OR "translat"[Title/Abstract] OR "cross-cultural"[Title/Abstract] OR "minimal clinically important difference"[Title/Abstract] OR "minimal important change"[Title/Abstract] OR "minimal important difference"[Title/Abstract] OR "clinically meaningful change"[Title/Abstract] OR "clinically meaningful difference"[Title/Abstract] OR "responsiveness"[Title/Abstract])) AND (("patient"[MeSH Terms] OR "Survivors"[MeSH Terms] OR "Palliative Care"[MeSH Terms]) AND ("Neoplasms"[MeSH Terms] OR "Carcinoma"[MeSH Terms] OR "post-cancer"[Title/Abstract] OR "postcancer"[Title/Abstract]))

#### 4. STEP 4:

- Find search string (which is used to gather the articles for our systematic review but remove English filter)
  - (((("instrument"[Title/Abstract] OR "questionnaire"[Title/Abstract] OR "measur"[Title/Abstract] OR "rating"[Title/Abstract] OR "computer"[Title/Abstract] OR "digital"[Title/Abstract] OR "computer-adaptive test"[Title/Abstract] OR "computer adaptive test"[Title/Abstract] OR "computer adaptive"[Title/Abstract] OR "computer-adaptive"[Title/Abstract] OR "computerized adaptive test"[Title/Abstract] OR "computerised adaptive test"[Title/Abstract] OR "CAT"[Title/Abstract]) AND ("chronbach"[Title/Abstract] OR "cronbach"[Title/Abstract] OR "psychometric properties"[Title/Abstract] OR "psychometr"[Title/Abstract] OR "factor analysis"[Title/Abstract] OR "develop"[Title/Abstract] OR "reliab"[Title/Abstract] OR "valid"[Title/Abstract] OR "translat"[Title/Abstract] OR "cross-cultural"[Title/Abstract] OR "minimal clinically important difference"[Title/Abstract] OR "minimal important change"[Title/Abstract] OR "minimal important difference"[Title/Abstract] OR "clinically meaningful change"[Title/Abstract] OR "clinically meaningful difference"[Title/Abstract] OR "responsiveness"[Title/Abstract])) AND ("quality of life"[MeSH Terms] OR "perceived health"[Text Word] OR "health status"[Text Word] OR "life satisfaction"[Text Word] OR "well-being"[Text Word] OR "wellbeing"[Text Word] OR "patient reported outcome measures"[MeSH Terms])) AND (("patient"[MeSH Terms] OR "Survivors"[MeSH Terms] OR "Palliative Care"[MeSH Terms]) AND ("Neoplasms"[MeSH Terms] OR "Carcinoma"[MeSH Terms] OR "post-cancer"[Title/Abstract] OR "postcancer"[Title/Abstract])) AND (english[Filter])) NOT (("animals"[MeSH Terms] NOT "humans"[MeSH Terms])) NOT (((("instrument"[Title/Abstract] OR "questionnaire"[Title/Abstract] OR "measur"[Title/Abstract] OR "rating"[Title/Abstract] OR "computer"[Title/Abstract] OR "digital"[Title/Abstract] OR "computer-adaptive test"[Title/Abstract] OR "computer adaptive test"[Title/Abstract] OR "computer adaptive"[Title/Abstract] OR "computer-adaptive"[Title/Abstract] OR "computerized adaptive test"[Title/Abstract] OR "computerised adaptive test"[Title/Abstract] OR "CAT"[Title/Abstract]) AND ("chronbach"[Title/Abstract] OR "cronbach"[Title/Abstract] OR "psychometric properties"[Title/Abstract] OR "psychometr"[Title/Abstract] OR "factor analysis"[Title/Abstract] OR "develop"[Title/Abstract] OR "reliab"[Title/Abstract] OR "valid"[Title/Abstract] OR "translat"[Title/Abstract] OR "cross-cultural"[Title/Abstract] OR "minimal clinically important difference"[Title/Abstract] OR "minimal important change"[Title/Abstract] OR "minimal important difference"[Title/Abstract] OR "clinically meaningful change"[Title/Abstract] OR "clinically meaningful difference"[Title/Abstract] OR "responsiveness"[Title/Abstract])) AND ("quality of life"[MeSH Terms] OR "perceived health"[Text Word] OR "health status"[Text Word] OR "life satisfaction"[Text Word] OR "well-being"[Text Word] OR "wellbeing"[Text Word] OR "patient reported outcome

measures"[MeSH Terms])) AND (("patient"[MeSH Terms] OR "Survivors"[MeSH Terms] OR "Palliative Care"[MeSH Terms]) AND ("Neoplasms"[MeSH Terms] OR "Carcinoma"[MeSH Terms] OR "post-cancer"[Title/Abstract] OR "postcancer"[Title/Abstract])) AND ((address[Filter] OR biography[Filter] OR casereports[Filter] OR comment[Filter] OR congress[Filter] OR consensusdevelopmentconference[Filter] OR consensusdevelopmentconferencenih[Filter] OR directory[Filter] OR editorial[Filter] OR festschrift[Filter] OR interview[Filter] OR lecture[Filter] OR legalcase[Filter] OR legislation[Filter] OR letter[Filter] OR news[Filter] OR newspaperarticle[Filter] OR patienteducationhandout[Filter] OR practiceguideline[Filter]))))

## 5. STEP 5:

- Combine search string of STEP 3 (POPULATION AND PSYCHOMETRIC PROPERTIES AND SPECIFIC QUESTIONNAIRE) and STEP 4 (ENTIRE search string) with NOT-function:
  - (((((((("European Organization for Research and Treatment of Cancer Quality of Life Questionnaire Core 30") OR (eortc-qlq-c30)) OR (eortc qlq-c30)) OR (eortc qlq c30)) OR (qlq c30)) AND (("instrument"[Title/Abstract] OR "questionnaire"[Title/Abstract] OR "measur"[Title/Abstract] OR "rating"[Title/Abstract] OR "computer"[Title/Abstract] OR "digital"[Title/Abstract] OR "computer-adaptive test"[Title/Abstract] OR "computer adaptive test"[Title/Abstract] OR "computer adaptive"[Title/Abstract] OR "computer-adaptive"[Title/Abstract] OR "computerized adaptive test"[Title/Abstract] OR "computerised adaptive test"[Title/Abstract] OR "CAT"[Title/Abstract]) AND ("chronbach"[Title/Abstract] OR "cronbach"[Title/Abstract] OR "psychometric properties"[Title/Abstract] OR "psychometr"[Title/Abstract] OR "factor analysis"[Title/Abstract] OR "develop"[Title/Abstract] OR "reliab"[Title/Abstract] OR "valid"[Title/Abstract] OR "translat"[Title/Abstract] OR "cross-cultural"[Title/Abstract] OR "minimal clinically important difference"[Title/Abstract] OR "minimal important change"[Title/Abstract] OR "minimal important difference"[Title/Abstract] OR "clinically meaningful change"[Title/Abstract] OR "clinically meaningful difference"[Title/Abstract] OR "responsiveness"[Title/Abstract])))) AND (((("patient"[MeSH Terms] OR "Survivors"[MeSH Terms] OR "Palliative Care"[MeSH Terms]) AND ("Neoplasms"[MeSH Terms] OR "Carcinoma"[MeSH Terms] OR "post-cancer"[Title/Abstract] OR "postcancer"[Title/Abstract])) NOT (((("instrument"[Title/Abstract] OR "questionnaire"[Title/Abstract] OR "measur"[Title/Abstract] OR "rating"[Title/Abstract] OR "computer"[Title/Abstract] OR "digital"[Title/Abstract] OR "computer-adaptive test"[Title/Abstract] OR "computer adaptive test"[Title/Abstract] OR "computer adaptive"[Title/Abstract] OR "computer-adaptive"[Title/Abstract] OR "computerized adaptive test"[Title/Abstract] OR "computerised adaptive test"[Title/Abstract] OR "CAT"[Title/Abstract]) AND ("chronbach"[Title/Abstract] OR "cronbach"[Title/Abstract] OR "psychometric properties"[Title/Abstract] OR "psychometr"[Title/Abstract] OR "factor analysis"[Title/Abstract] OR "develop"[Title/Abstract] OR "reliab"[Title/Abstract] OR "valid"[Title/Abstract] OR "translat"[Title/Abstract] OR "cross-cultural"[Title/Abstract] OR "minimal clinically important difference"[Title/Abstract] OR "minimal important change"[Title/Abstract] OR "minimal important difference"[Title/Abstract] OR "clinically meaningful change"[Title/Abstract] OR "clinically meaningful difference"[Title/Abstract] OR "responsiveness"[Title/Abstract])) AND ("quality of life"[MeSH Terms] OR "perceived health"[Text Word] OR "health status"[Text Word] OR "life satisfaction"[Text Word] OR "well-being"[Text Word] OR "wellbeing"[Text Word] OR "patient reported outcome measures"[MeSH Terms])) AND (((("patient"[MeSH Terms] OR "Survivors"[MeSH Terms] OR "Palliative Care"[MeSH Terms]) AND ("Neoplasms"[MeSH Terms] OR "Carcinoma"[MeSH Terms] OR "post-cancer"[Title/Abstract] OR "postcancer"[Title/Abstract])) AND (english[Filter])) NOT ((("animals"[MeSH Terms] NOT "humans"[MeSH Terms])) NOT (((("instrument"[Title/Abstract] OR "questionnaire"[Title/Abstract] OR

"measur\*[Title/Abstract] OR "rating\*[Title/Abstract] OR "computer\*[Title/Abstract] OR "digital\*[Title/Abstract] OR "computer-adaptive test\*[Title/Abstract] OR "computer adaptive test\*[Title/Abstract] OR "computer adaptive"[Title/Abstract] OR "computer-adaptive"[Title/Abstract] OR "computerized adaptive test\*[Title/Abstract] OR "computerised adaptive test\*[Title/Abstract] OR "CAT"[Title/Abstract]) AND ("chronbach\*[Title/Abstract] OR "cronbach\*[Title/Abstract] OR "psychometric properties"[Title/Abstract] OR "psychometr\*[Title/Abstract] OR "factor analysis"[Title/Abstract] OR "develop\*[Title/Abstract] OR "reliab\*[Title/Abstract] OR "valid\*[Title/Abstract] OR "translat\*[Title/Abstract] OR "cross-cultural"[Title/Abstract] OR "minimal clinically important difference\*[Title/Abstract] OR "minimal important change\*[Title/Abstract] OR "minimal important difference\*[Title/Abstract] OR "clinically meaningful change\*[Title/Abstract] OR "clinically meaningful difference\*[Title/Abstract] OR "responsiveness"[Title/Abstract])) AND ("quality of life"[MeSH Terms] OR "perceived health"[Text Word] OR "health status"[Text Word] OR "life satisfaction"[Text Word] OR "well-being"[Text Word] OR "wellbeing"[Text Word] OR "patient reported outcome measures"[MeSH Terms])) AND (("patient\*[MeSH Terms] OR "Survivors"[MeSH Terms] OR "Palliative Care"[MeSH Terms] AND ("Neoplasms"[MeSH Terms] OR "Carcinoma"[MeSH Terms] OR "post-cancer"[Title/Abstract] OR "postcancer"[Title/Abstract])) AND ((address[Filter] OR biography[Filter] OR casereports[Filter] OR comment[Filter] OR congress[Filter] OR consensusdevelopmentconference[Filter] OR consensusdevelopmentconferencenih[Filter] OR directory[Filter] OR editorial[Filter] OR festschrift[Filter] OR interview[Filter] OR lecture[Filter] OR legalcase[Filter] OR legislation[Filter] OR letter[Filter] OR news[Filter] OR newspaperarticle[Filter] OR patienteducationhandout[Filter] OR practiceguideline[Filter])))

#### **6. STEP 6: Apply “English” filter**

#### **7. STEP 7: Assess and screen articles for the predefined in- and exclusion criteria**



#### Appendix 4. Overview of the data extraction for the PROMs measurement properties

| Measurement property                                   | Data extracted                                                                                                                                                                                                                                                                                                           |
|--------------------------------------------------------|--------------------------------------------------------------------------------------------------------------------------------------------------------------------------------------------------------------------------------------------------------------------------------------------------------------------------|
| <b>Development/ Content validity</b>                   | <ul style="list-style-type: none"> <li>- Level of analysis: scale/subscale</li> <li>- Methodological approach for concept elicitation, PROM design, relevance, comprehensiveness and comprehensibility</li> </ul>                                                                                                        |
| <b>Structural validity/ Unidimensionality</b>          | <ul style="list-style-type: none"> <li>- Level of analysis: scale/subscale</li> <li>- Statistical approach and related sample size: EFA, CFA or IRT</li> <li>- Final model and fit indexes: CFI, TLI, RMSEA (90%CI) SRMR or WRMR</li> </ul>                                                                              |
| <b>Internal consistency</b>                            | <ul style="list-style-type: none"> <li>- Level of analysis: scale/subscale</li> <li>- Statistical approach and related sample size</li> <li>- Internal consistency reliability coefficients: Cronbach alpha, McDonald Omega, KR-20, SE(θ)</li> </ul>                                                                     |
| <b>Cross-cultural validity/ Measurement invariance</b> | <ul style="list-style-type: none"> <li>- Level of analysis: scale/subscale</li> <li>- Statistical approach and related sample size</li> <li>- Group variable under investigation (e.g. country, age, gender,...) with its observed differences</li> </ul>                                                                |
| <b>Reliability</b>                                     | <ul style="list-style-type: none"> <li>- Level of analysis: scale/subscale</li> <li>- Statistical approach and related sample size</li> <li>- Type of reliability: test-retest, inter-rater, intra-rater, parallel forms</li> <li>- Correlation coefficients: ICC, Spearman, Pearson, Kappa or weighted Kappa</li> </ul> |
| <b>Measurement error</b>                               | <ul style="list-style-type: none"> <li>- Level of analysis: scale/subscale</li> <li>- Statistical approach and related sample size</li> <li>- Standard Error of Measurement, Limits of Agreement, Smallest Detectable Change, Minimal Important Change</li> </ul>                                                        |
| <b>Construct validity with other PROM</b>              | <ul style="list-style-type: none"> <li>- Level of analysis: scale/subscale</li> <li>- Statistical approach and related sample size</li> <li>- Comparator + formulated hypotheses</li> <li>- Correlation coefficients or effect sizes</li> </ul>                                                                          |
| <b>Convergent/ divergent validity within PROM</b>      | <ul style="list-style-type: none"> <li>- Level of analysis: scale/subscale</li> <li>- Statistical approach and related sample size</li> <li>- Formulated hypotheses</li> <li>- Correlation coefficients</li> </ul>                                                                                                       |
| <b>Known-group comparison</b>                          | <ul style="list-style-type: none"> <li>- Level of analysis: scale/subscale</li> <li>- Statistical approach and related sample size</li> <li>- Formulated hypotheses</li> <li>- Group variable + defined subgroups with observed differences</li> </ul>                                                                   |

*Abbreviations:* CFA = Confirmatory Factor Analysis; CFI = Comparative Fit Index; IRT = Item Response Theory; RMSEA = Root Mean Square Error of Approximation; SDC = Smallest Detectable Change; SRMR: Standardized Root Mean Residuals; TLI: Tucker-Lewis Index; WRMR: Weighted Root Mean Residuals



**Appendix 5: Overview of adjustments made to the Risk of Bias rating of COSMIN Guidelines**

| Psychometric property                                                      | Criteria | Adjustment made                                                                                 |
|----------------------------------------------------------------------------|----------|-------------------------------------------------------------------------------------------------|
| <b>PROM development (Box 1)</b>                                            | 23       | Inadequate rating was removed from the response options.                                        |
|                                                                            | 25       | Adequate and doubtful rating were removed from the response options.                            |
|                                                                            | 26       | Doubtful rating was removed and inadequate was defined as "NO or not clear (SKIP items 27-35)". |
|                                                                            | 35       | Adequate and doubtful rating were removed from the response options.                            |
| <b>Content validity (Box 2)</b>                                            | 6        | Inadequate rating was removed from the response options.                                        |
|                                                                            | 13       | Inadequate rating was removed from the response options.                                        |
|                                                                            | 20       | Inadequate rating was removed from the response options.                                        |
|                                                                            | 25       | Inadequate rating was removed from the response options.                                        |
| <b>Structural validity (Box 3)</b>                                         | 30       | Inadequate rating was removed from the response options.                                        |
|                                                                            |          |                                                                                                 |
|                                                                            |          |                                                                                                 |
|                                                                            |          |                                                                                                 |
| <b>Internal consistency (Box 4)</b>                                        | 2        | Adequate rating was removed from the response options.                                          |
| <b>Internal consistency (Box 4)</b>                                        | 5        | Criteria 5 was removed from the Risk of bias assessment.                                        |
|                                                                            |          |                                                                                                 |
|                                                                            |          |                                                                                                 |
|                                                                            |          |                                                                                                 |
| <b>Cross-cultural validity &amp; Measurement invariance (Box 5)</b>        | 4        | Criteria 4 was removed from the Risk of bias assessment.                                        |
| <b>Reliability (Box 6)</b>                                                 |          |                                                                                                 |
|                                                                            |          |                                                                                                 |
|                                                                            |          |                                                                                                 |
|                                                                            |          |                                                                                                 |
| <b>Measurement error (Box 7)</b>                                           | 1-3      | Not applicable rating was added to the response options.                                        |
| <b>Measurement error (Box 7)</b>                                           | 6        | Adequate rating was removed from the response options.                                          |
|                                                                            |          |                                                                                                 |
|                                                                            |          |                                                                                                 |
|                                                                            |          |                                                                                                 |
| <b>Construct validity (with other PROM) (hypothesis testing) (Box 9.a)</b> | 4        | Inadequate rating was removed from the response options.                                        |
|                                                                            |          |                                                                                                 |
|                                                                            |          |                                                                                                 |
|                                                                            |          |                                                                                                 |
| <b>Construct validity (with other PROM) (hypothesis testing) (Box 9.a)</b> | 1-4      | Not applicable rating was added to the response options.                                        |
|                                                                            |          |                                                                                                 |
|                                                                            |          |                                                                                                 |
|                                                                            |          |                                                                                                 |
| <b>Construct validity (Known-group comparison) (Box 9.b)</b>               | 7        | Inadequate rating was removed from the response options.                                        |
|                                                                            |          |                                                                                                 |
|                                                                            |          |                                                                                                 |
|                                                                            |          |                                                                                                 |
| <b>Construct validity (Known-group comparison) (Box 9.b)</b>               | 5-7      | Not applicable rating was added to the response options.                                        |
|                                                                            |          |                                                                                                 |
|                                                                            |          |                                                                                                 |
|                                                                            |          |                                                                                                 |
| <b>Construct validity (convergent &amp; divergent validity)</b>            | 1        | Criteria 3 of Box 9.a was introduced.                                                           |

## Appendix 6: The 10 criteria for good content validity

|   |   | PROM development study                                                                                                                                                                                                                                                                                                                                  |   | Content validity study                                                                                                                                                                                                                    |   | Rating of reviewers                                                                                                                                                    |
|---|---|---------------------------------------------------------------------------------------------------------------------------------------------------------------------------------------------------------------------------------------------------------------------------------------------------------------------------------------------------------|---|-------------------------------------------------------------------------------------------------------------------------------------------------------------------------------------------------------------------------------------------|---|------------------------------------------------------------------------------------------------------------------------------------------------------------------------|
| 1 | + | Construct of interest is clearly described ( <b>criterion 1 of box 1A = very good</b> ) AND origin of construct is clear ( <b>criterion 2 of box 1A = very good</b> ) AND the is evidence from concept elicitation, literature or professionals that ≥85% of the items refer to construct of interest                                                   | + | Professionals rated the relevance of items for the construct of interest as sufficient ( <b>criteria 22-26 of box 2D = very good, adequate or doubtful</b> ) and found ≥85% of the items relevant for the construct                       | + | Reviewers consider ≥85% of the items relevant for the construct of interest                                                                                            |
|   | - | Quality is inadequate (≥1 of the 3 (+)-criteria is not fulfilled)                                                                                                                                                                                                                                                                                       | - | Professionals were not involved in the content validity study OR rated <85% of the items of the PROM relevant for the construct                                                                                                           | - | Reviewers consider <85% of the items relevant for the construct of interest                                                                                            |
|   | ? | No(t enough) information available to score a (+) or (-)                                                                                                                                                                                                                                                                                                | ? | No(t enough) information available to score a (+) or (-)                                                                                                                                                                                  |   |                                                                                                                                                                        |
| 2 | + | Target population of interest is clearly described ( <b>criterion 3 of box 1A = very good</b> ) AND representative patients were involved in the elicitation of relevant items ( <b>criterion 5 of box 1A = very good or adequate</b> ) AND concept elicitation was not inadequate ( <b>criteria 6-13 of box 1A = very good, adequate or doubtful</b> ) | + | Patients rated the relevance of items for the construct of interest as sufficient ( <b>criteria 1-7 of box 2A = very good, adequate or doubtful</b> ) and found ≥85% of the items relevant for them                                       | + | Reviewers consider ≥85% of the items relevant for the population of interest                                                                                           |
|   | - | Quality is inadequate (≥1 of the 3 (+)-criteria is not fulfilled)                                                                                                                                                                                                                                                                                       | - | Patients were not involved in the content validity study OR rated <85% of the items of the PROM relevant for them                                                                                                                         | - | Reviewers consider <85% of the items relevant for the population of interest                                                                                           |
|   | ? | No(t enough) information available to score a (+) or (-) OR doubtful whether study was performed in a sample representing the target population                                                                                                                                                                                                         | ? | No(t enough) information available to score a (+) or (-)                                                                                                                                                                                  |   |                                                                                                                                                                        |
| 3 | + | The context of use of interest is clearly described ( <b>criterion 4 of box 1A = very good</b> )                                                                                                                                                                                                                                                        | + | Professionals rated the relevance of items for the context of use as sufficient ( <b>criteria 22-26 of box 2D = very good, adequate or doubtful</b> ) and found ≥85% of the items relevant for the context of use                         | + | Reviewers consider ≥85% of the items relevant for the context of use of interest                                                                                       |
|   | - | The context of use of interest is not clearly described ( <b>criterion 4 of box 1A = doubtful</b> )                                                                                                                                                                                                                                                     | - | Professionals were not involved in the content validity study OR rated <85% of the items of the PROM relevant for the context of use                                                                                                      | - | Reviewers consider <85% of the items relevant for the context of use of interest                                                                                       |
|   | ? | No(t enough) information available to score a (+) or (-)                                                                                                                                                                                                                                                                                                | ? | No(t enough) information available to score a (+) or (-)                                                                                                                                                                                  |   |                                                                                                                                                                        |
| 4 | + | A justification is provided for the response options                                                                                                                                                                                                                                                                                                    | + | Patients or professionals rated the appropriateness of the response options as sufficient ( <b>criteria 1-7 of box 2A or criteria 22-26 of box 2D = very good, adequate or doubtful</b> ) and found ≥85% of the response options relevant | + | Reviewers consider ≥85% of the response options appropriate for the construct, population, and context of use of interest                                              |
|   | - | No justification was provided for the response options                                                                                                                                                                                                                                                                                                  | - | Patients or professionals were not involved in the content validity study OR rated <85% of the response options of the PROM relevant                                                                                                      | - | Reviewers consider <85% of the response options appropriate for the construct, population, and context of use of interest                                              |
|   | ? | No(t enough) information available to score a (+) or (-)                                                                                                                                                                                                                                                                                                | ? | No(t enough) information available to score a (+) or (-)                                                                                                                                                                                  |   |                                                                                                                                                                        |
| 5 | + | A justification is provided for the recall period                                                                                                                                                                                                                                                                                                       | + | Patients or professionals rated the appropriateness of the recall period as sufficient ( <b>criteria 1-7 of box 2A or criteria 22-26 of box 2D = very good, adequate or doubtful</b> ) and found the recall period relevant               | + | Reviewers consider the recall period appropriate for the construct, population and context of use of interest for <b>≥85% of the items</b> .                           |
|   | - | No justification is provided for the recall period                                                                                                                                                                                                                                                                                                      | - | Patients or professionals were not involved in the content validity study OR rated the recall period for <85% of the items of the PROM relevant                                                                                           | - | Reviewers consider the recall period <b>only partially</b> (<85% of the items) <b>OR not</b> appropriate for the construct, population and context of use of interest. |
|   | ? | No(t enough) information available to score a (+) or (-)                                                                                                                                                                                                                                                                                                | ? | No(t enough) information available to score a (+) or (-)                                                                                                                                                                                  |   |                                                                                                                                                                        |
| 6 | + | Patients were asked about the comprehensiveness of the PROM in concept elicitation phase or cognitive interview                                                                                                                                                                                                                                         | + | Patients or professionals were asked about the comprehensiveness of the PROM ( <b>criteria 8-14 of box 2B or</b>                                                                                                                          | + | Reviewers consider the PROM <b>comprehensive</b> for the construct, population and context of use of interest for <b>≥85%</b>                                          |

|    |   | (criteria 6-13 of box 1A or criteria 26-35 of box 1B = very good, adequate or doubtful) AND no key concepts were missing                                                                                                                                       |   | criteria 27-31 of box 2E = very good, adequate or doubtful) AND no key concepts were missing                                                                                                                                                                                            |   | of the items.                                                                                                                                                                                    |
|----|---|----------------------------------------------------------------------------------------------------------------------------------------------------------------------------------------------------------------------------------------------------------------|---|-----------------------------------------------------------------------------------------------------------------------------------------------------------------------------------------------------------------------------------------------------------------------------------------|---|--------------------------------------------------------------------------------------------------------------------------------------------------------------------------------------------------|
|    | - | Quality is inadequate ( $\geq 1$ of the 2 (+)-criteria is not fulfilled)                                                                                                                                                                                       | - | Patients or professionals were not involved in the content validity study OR quality is inadequate ( $\geq 1$ of the 2 (+)-criteria is not fulfilled)                                                                                                                                   | - | Reviewers consider the PROM <b>only partially</b> (<85% of the items) <b>OR not comprehensive</b> for the construct, population and context of use of interest comprehensive (<85% of the items) |
|    | ? | No(t enough) information available to score a (+) or (-)                                                                                                                                                                                                       | ? | No(t enough) information available to score a (+) or (-)                                                                                                                                                                                                                                |   |                                                                                                                                                                                                  |
| 7  | + | Patients were asked about the comprehensibility of the instructions (including recall period) in cognitive interview (criteria 16-25 of box 1B = very good, adequate or doubtful) AND problems were adequately addressed                                       | + | Patients were asked about the comprehensibility of the instructions (including recall period) (criteria 15-21 of box 2C = very good, adequate or doubtful) AND no important problems were found                                                                                         | + |                                                                                                                                                                                                  |
|    | - | Quality is inadequate ( $\geq 1$ of the 2 (+)-criteria is not fulfilled)                                                                                                                                                                                       | - | Patients were not involved in the content validity study OR quality is inadequate ( $\geq 1$ of the 2 (+)-criteria is not fulfilled)                                                                                                                                                    | - |                                                                                                                                                                                                  |
|    | ? | No(t enough) information available to score a (+) or (-)                                                                                                                                                                                                       | ? | No(t enough) information available to score a (+) or (-)                                                                                                                                                                                                                                |   |                                                                                                                                                                                                  |
| 8  | + | Patients were asked about the comprehensibility of the items and response options (including wording of items and response options) in cognitive interview (criteria 16-25 of box 1B = very good, adequate or doubtful) AND problems were adequately addressed | + | Patients were asked about the comprehensibility of the items and response options (including wording of items and response options) (criteria 15-21 of box 2C = very good, adequate or doubtful) AND no important problems were found for $\geq 85\%$ of the items and response options | + |                                                                                                                                                                                                  |
|    | - | Quality is inadequate ( $\geq 1$ of the 2 (+)-criteria is not fulfilled)                                                                                                                                                                                       | - | Patients were not involved in the content validity study OR quality is inadequate ( $\geq 1$ of the 2 (+)-criteria is not fulfilled)                                                                                                                                                    | - |                                                                                                                                                                                                  |
|    | ? | No(t enough) information available to score a (+) or (-)                                                                                                                                                                                                       | ? | No(t enough) information available to score a (+) or (-)                                                                                                                                                                                                                                |   |                                                                                                                                                                                                  |
| 9  | + |                                                                                                                                                                                                                                                                | + |                                                                                                                                                                                                                                                                                         | + | Reviewers consider $\geq 85\%$ of the items and response options appropriately worded                                                                                                            |
|    | - |                                                                                                                                                                                                                                                                | - |                                                                                                                                                                                                                                                                                         | - | Reviewers consider <85% of the items and response options appropriately worded                                                                                                                   |
|    | ? |                                                                                                                                                                                                                                                                | ? |                                                                                                                                                                                                                                                                                         |   |                                                                                                                                                                                                  |
| 10 | + |                                                                                                                                                                                                                                                                | + |                                                                                                                                                                                                                                                                                         | + | Reviewers consider $\geq 85\%$ of the response options matching the questions                                                                                                                    |
|    | - |                                                                                                                                                                                                                                                                | - |                                                                                                                                                                                                                                                                                         | - | Reviewers consider <85% of the response options matching the questions                                                                                                                           |
|    | ? |                                                                                                                                                                                                                                                                | ? |                                                                                                                                                                                                                                                                                         |   |                                                                                                                                                                                                  |

Appendix 7: Calculation of the overall relevance, comprehensiveness and comprehensibility rating per study

|                          |   | PROM development                                                                                   |   | Content validity                                                                                   |   | Reviewer rating                                                                                    |
|--------------------------|---|----------------------------------------------------------------------------------------------------|---|----------------------------------------------------------------------------------------------------|---|----------------------------------------------------------------------------------------------------|
| Relevance rating         | + | Criteria 1 and 2 are rated sufficient (+) AND ≥2 of remaining 3 items are rated sufficient (+)     | + | Criteria 1 and 2 are rated sufficient (+) AND ≥2 of remaining 3 items are rated sufficient (+)     | + | Criteria 1 and 2 are rated sufficient (+) AND ≥2 of remaining 3 items are rated sufficient (+)     |
|                          | - | Criteria 1 and 2 are rated insufficient (-) AND ≥2 of remaining 3 items are rated insufficient (-) | - | Criteria 1 and 2 are rated insufficient (-) AND ≥2 of remaining 3 items are rated insufficient (-) | - | Criteria 1 and 2 are rated insufficient (-) AND ≥2 of remaining 3 items are rated insufficient (-) |
|                          | ? | ≥2 criteria are rated indeterminate (?)                                                            | ? | ≥2 criteria are rated indeterminate (?)                                                            |   |                                                                                                    |
|                          | ± | All other situations                                                                               | ± | All other situations                                                                               | ± | All other situations                                                                               |
| Comprehensiveness rating |   | Rating of criterion 6                                                                              |   | Rating of criterion 6                                                                              |   | Rating of criterion 6                                                                              |
| Comprehensibility rating | + | Criterion 8 = sufficient (+) AND criterion 7 = sufficient (+) or indeterminate (?)                 | + | Criterion 8 = sufficient (+) AND criterion 7 = sufficient (+) or indeterminate (?)                 | + | Criteria 9 and 10 are rated sufficient (+)                                                         |
|                          | - | Criterion 8 = insufficient (-)                                                                     | - | Criterion 8 = insufficient (-)                                                                     | - | Criteria 9 and 10 are rated insufficient (-)                                                       |
|                          | ? | Criterion 8 = indeterminate (?)                                                                    | ? | Criterion 8 = indeterminate (?)                                                                    |   |                                                                                                    |
|                          | ± | Criterion 8 = sufficient (+) AND criterion 7 = insufficient (-)                                    | ± | Criterion 8 = sufficient (+) AND criterion 7 = insufficient (-)                                    | ± | One criterion = sufficient (+) AND one criterion = insufficient (-)                                |

Appendix 8: Calculation of the overall relevance, comprehensiveness and comprehensibility rating per PROM

| PROM development | Content validity | Rating reviewer | Overall<br>RELEVANCE<br>COMPREHENSIVENES<br>COMPREHENSIBILITY<br>rating |
|------------------|------------------|-----------------|-------------------------------------------------------------------------|
| +                | +                | +               | +                                                                       |
| +                | +                | ±               | +                                                                       |
| +                | +                | -               | +                                                                       |
| +                | -                | +               | ±                                                                       |
| +                | -                | ±               | ±                                                                       |
| +                | -                | -               | -                                                                       |
| +                | ?                | +               | +                                                                       |
| +                | ?                | ±               | ±                                                                       |
| +                | ?                | -               | ±                                                                       |
| +                | ±                | +               | ±                                                                       |
| +                | ±                | ±               | ±                                                                       |
| +                | ±                | -               | ±                                                                       |
| -                | +                | +               | +                                                                       |
| -                | +                | ±               | ±                                                                       |
| -                | +                | -               | ±                                                                       |
| -                | -                | +               | -                                                                       |
| -                | -                | ±               | -                                                                       |
| -                | -                | -               | -                                                                       |
| -                | ?                | +               | ±                                                                       |
| -                | ?                | ±               | ±                                                                       |
| -                | ?                | -               | -                                                                       |
| -                | ±                | +               | ±                                                                       |
| -                | ±                | ±               | ±                                                                       |
| -                | ±                | -               | ±                                                                       |
| ?                | +                | +               | +                                                                       |
| ?                | +                | ±               | ±                                                                       |
| ?                | +                | -               | ±                                                                       |
| ?                | -                | +               | ±                                                                       |
| ?                | -                | ±               | ±                                                                       |
| ?                | -                | -               | -                                                                       |
| ?                | ?                | +               | +                                                                       |
| ?                | ?                | ±               | ±                                                                       |
| ?                | ?                | -               | -                                                                       |
| ?                | ±                | +               | ±                                                                       |
| ?                | ±                | ±               | ±                                                                       |
| ?                | ±                | -               | ±                                                                       |
| ±                | +                | +               | +                                                                       |
| ±                | +                | ±               | +                                                                       |
| ±                | +                | -               | ±                                                                       |
| ±                | -                | +               | ±                                                                       |
| ±                | -                | ±               | -                                                                       |
| ±                | -                | -               | -                                                                       |
| ±                | ?                | +               | ±                                                                       |
| ±                | ?                | ±               | ±                                                                       |
| ±                | ?                | -               | ±                                                                       |
| ±                | ±                | +               | ±                                                                       |
| ±                | ±                | ±               | ±                                                                       |
| ±                | ±                | -               | -                                                                       |

Appendix 9: Calculation of the overall content validity rating

| Overall RELEVANCE rating | Overall COMPREHENSIVENESS rating | Overall COMPREHENSIBILITY rating | Overall CONTENT VALIDITY rating |
|--------------------------|----------------------------------|----------------------------------|---------------------------------|
| +                        | +                                | +                                | +                               |
| +                        | +                                | ±                                | +                               |
| +                        | +                                | -                                | ±                               |
| +                        | -                                | +                                | ±                               |
| +                        | -                                | ±                                | ±                               |
| +                        | -                                | -                                | ±                               |
| +                        | ±                                | +                                | +                               |
| +                        | ±                                | ±                                | ±                               |
| +                        | ±                                | -                                | ±                               |
| -                        | +                                | +                                | ±                               |
| -                        | +                                | ±                                | ±                               |
| -                        | +                                | -                                | ±                               |
| -                        | -                                | +                                | ±                               |
| -                        | -                                | ±                                | -                               |
| -                        | -                                | -                                | -                               |
| -                        | ±                                | +                                | ±                               |
| -                        | ±                                | ±                                | ±                               |
| -                        | ±                                | -                                | -                               |
| ±                        | +                                | +                                | +                               |
| ±                        | +                                | ±                                | ±                               |
| ±                        | +                                | -                                | ±                               |
| ±                        | -                                | +                                | ±                               |
| ±                        | -                                | ±                                | ±                               |
| ±                        | -                                | -                                | -                               |
| ±                        | ±                                | +                                | ±                               |
| ±                        | ±                                | ±                                | ±                               |
| ±                        | ±                                | -                                | ±                               |
